# Supplementary material
Source: PubMed Central journal article supplement (PMC7517710)

Fig S1

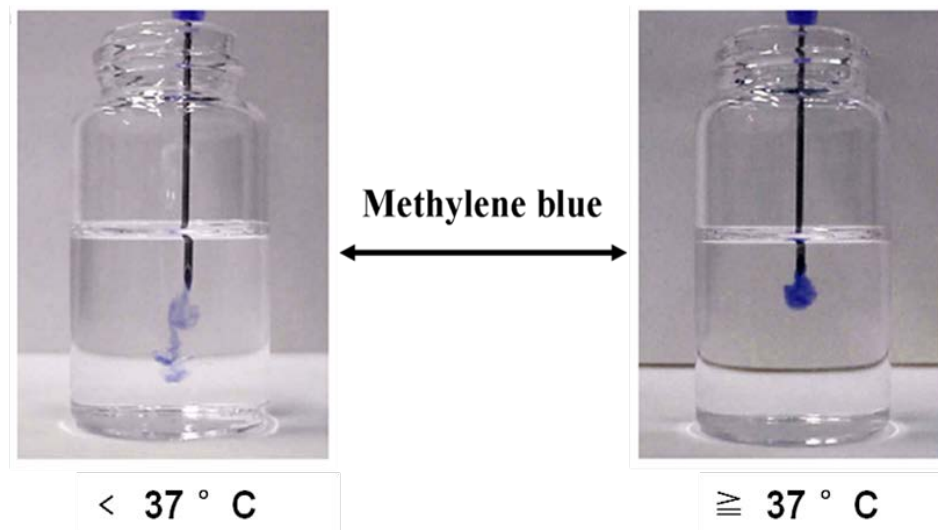

Fig S2

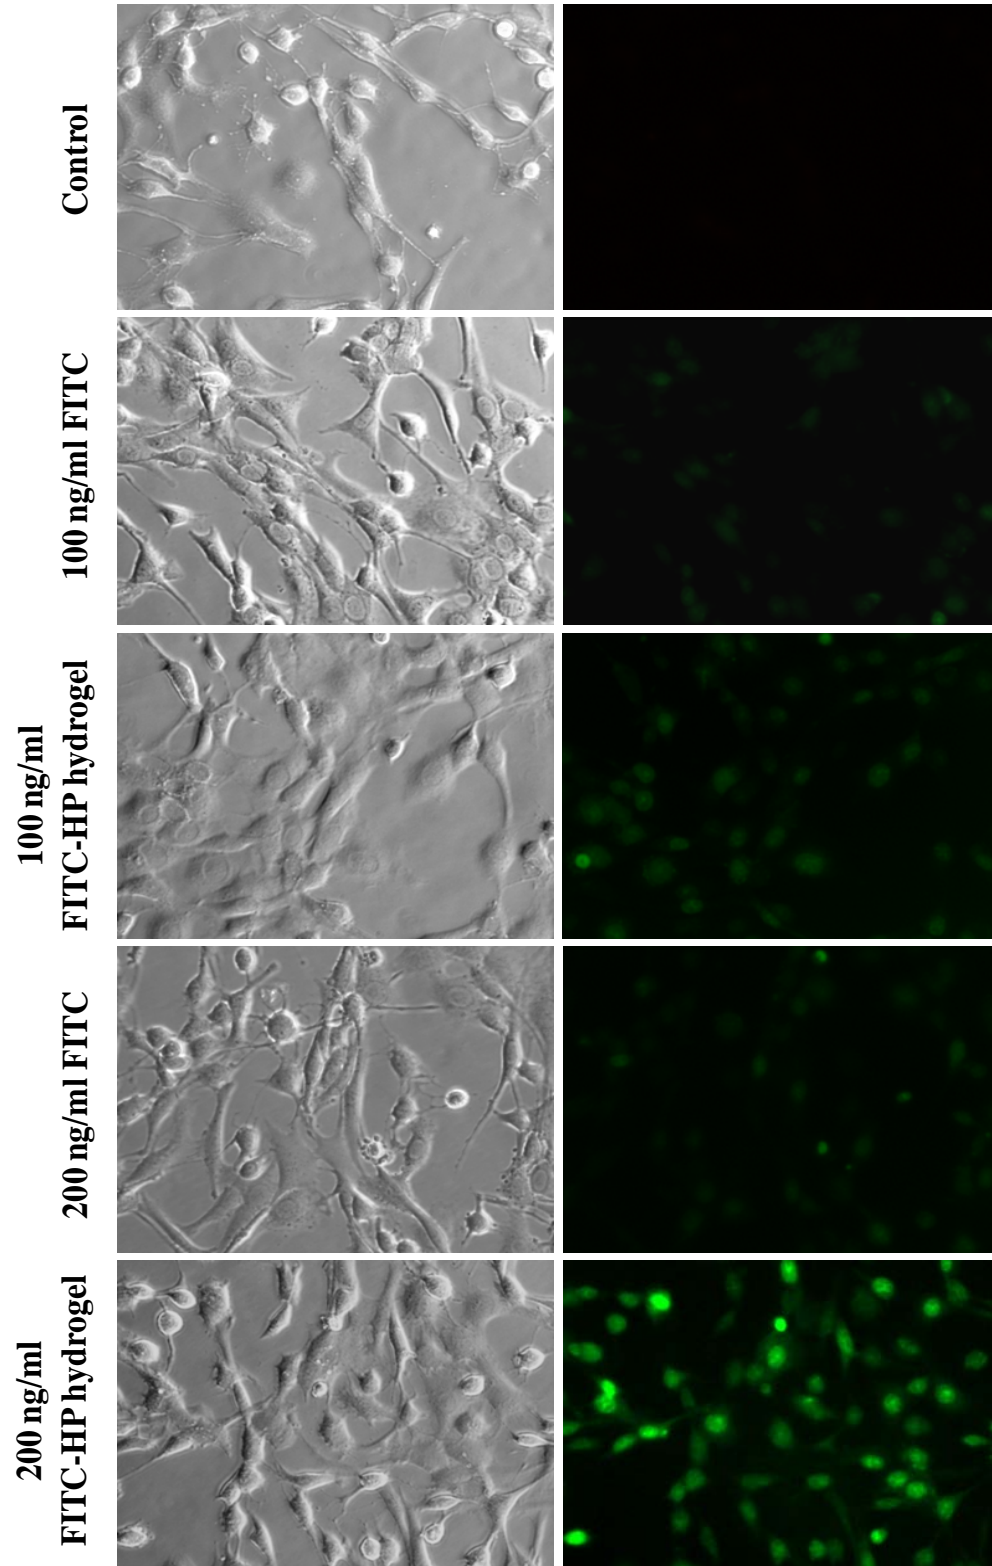

Fig S3

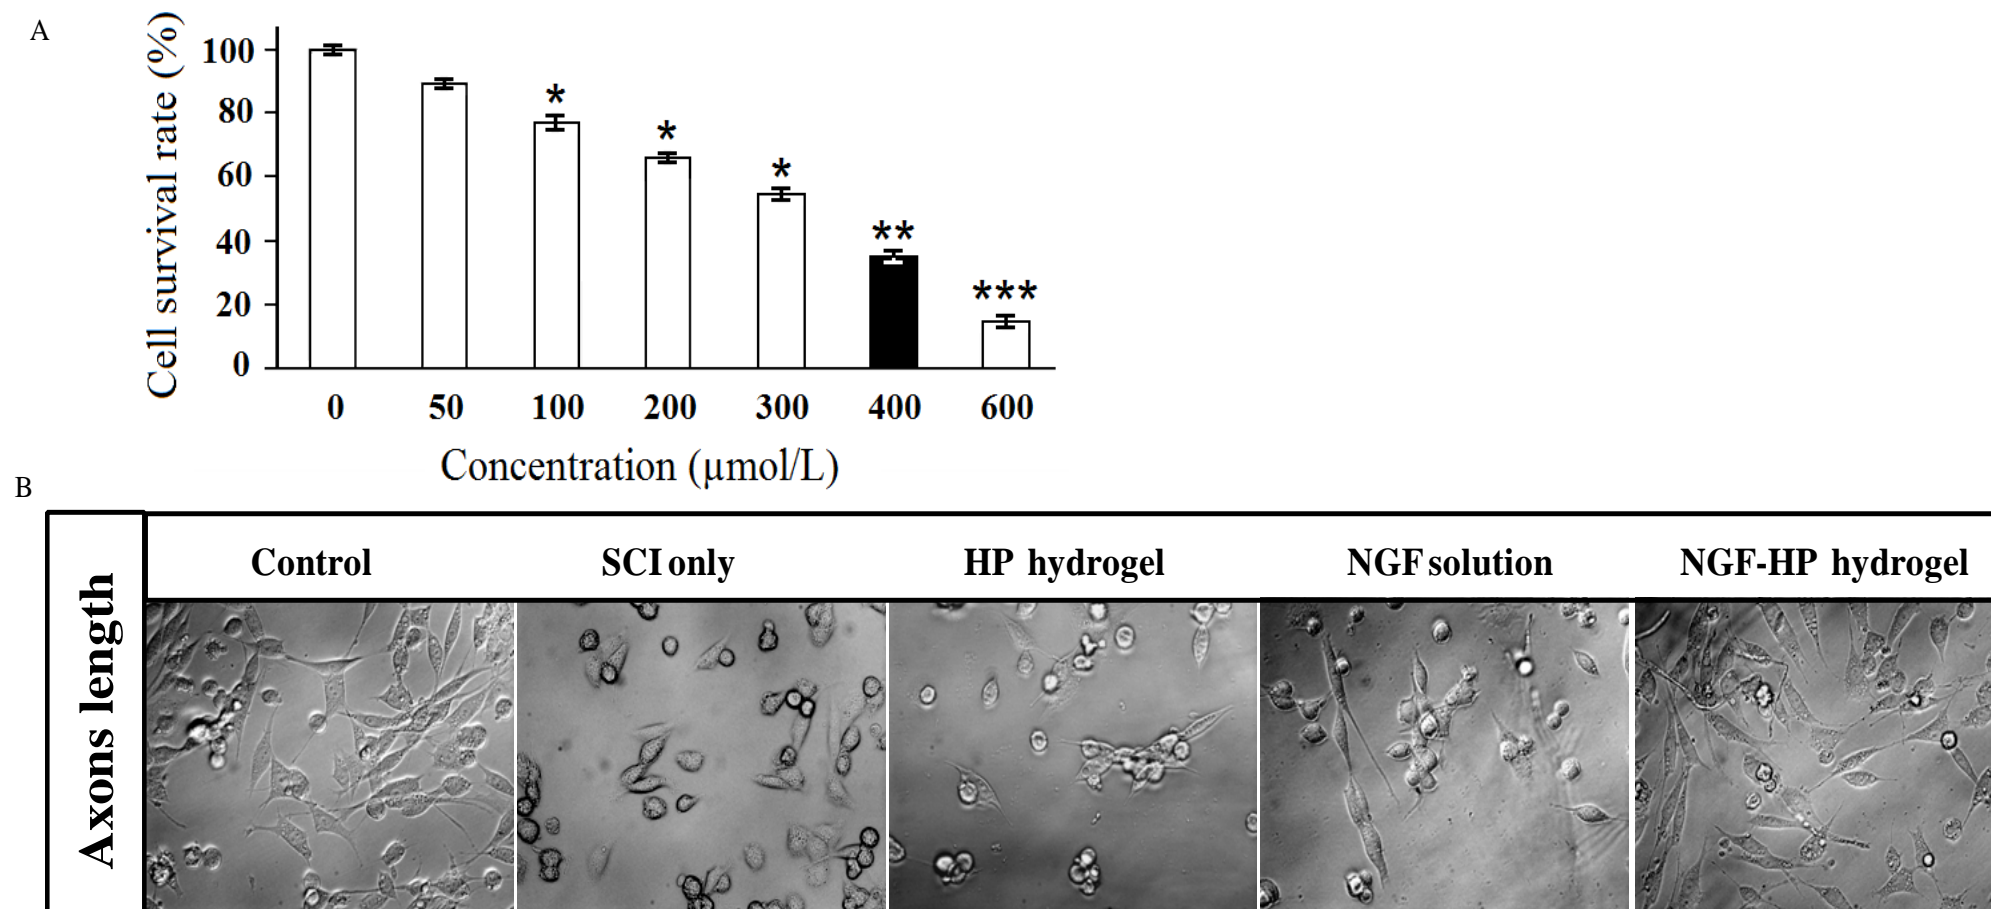

Fig S4

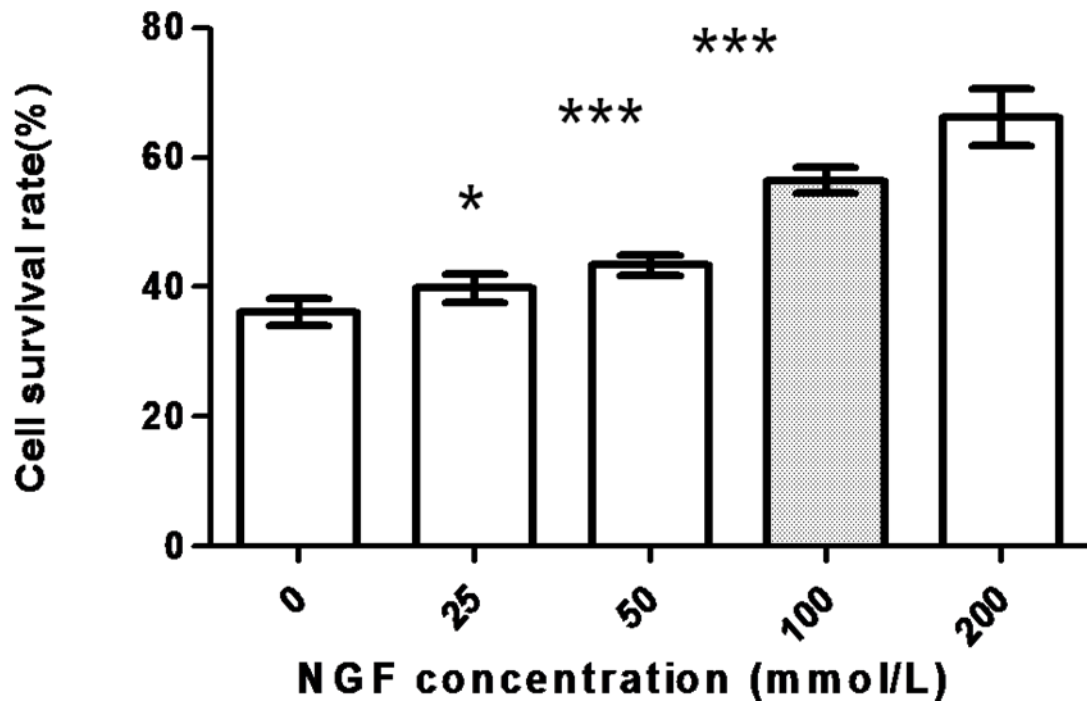

Fig S5

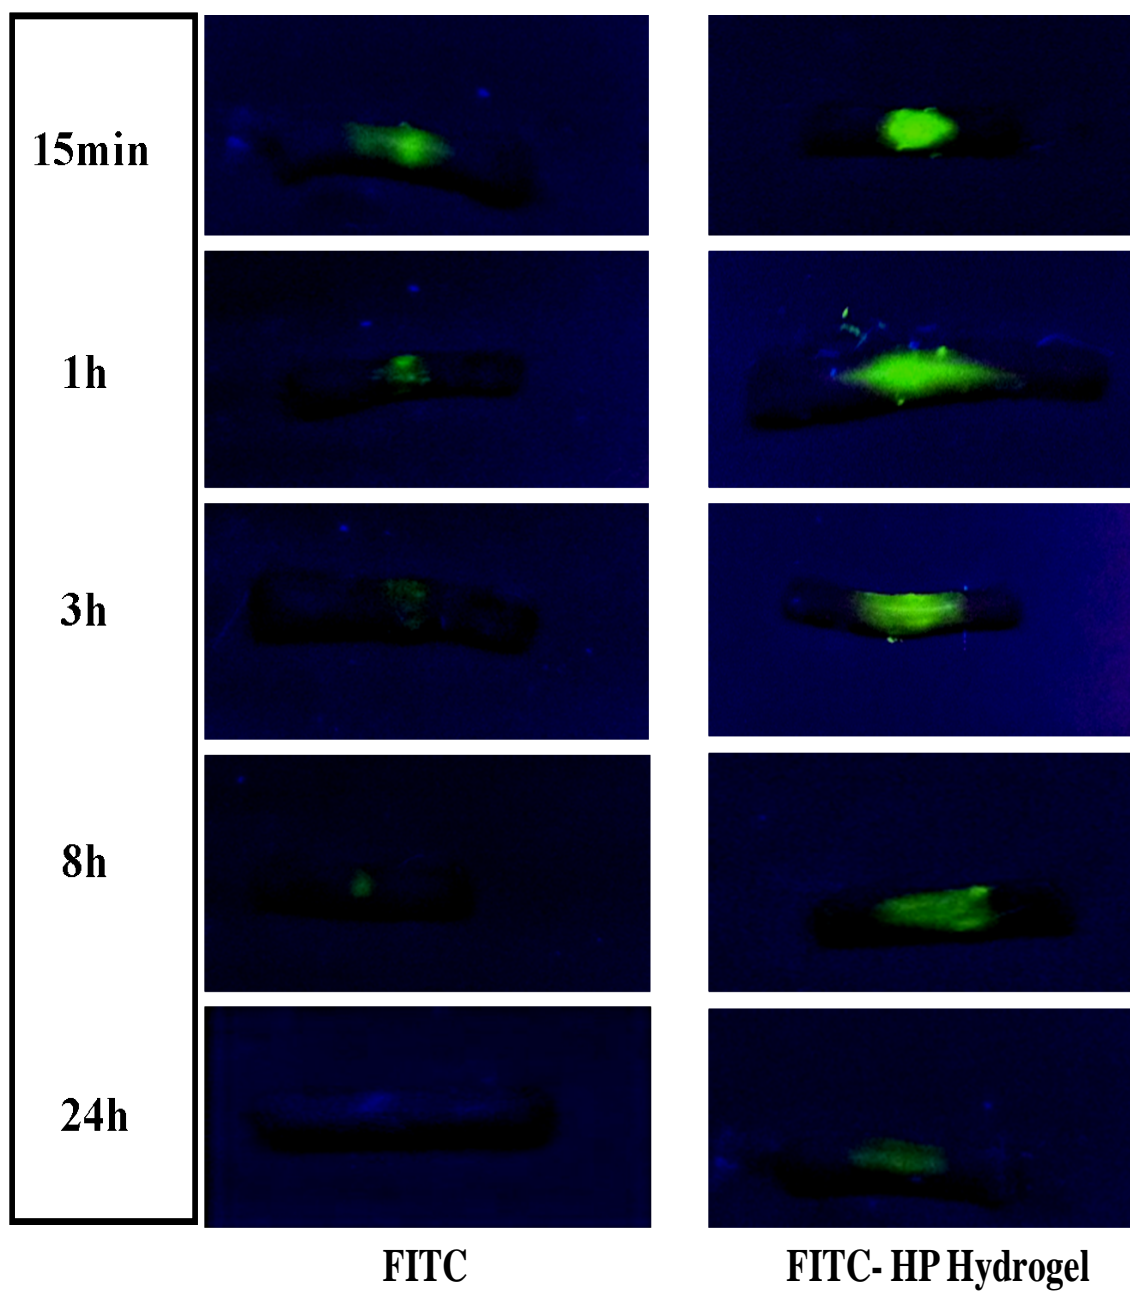

Supplement: NIHMS1629651-supplement-2.pdf [file NIHMS1629651-supplement-2.pdf]
